# Supplementary material
Source: Springer Nature journal article supplement (https://www.springermedizin.de/resource/supplementary/12889_2014_7295_MOESM3_ESM.pdf/9499694)

“A drop hits the water, where the ripples spread out”

In the middle the domain is just starting,  
on the outside the domain is very strong

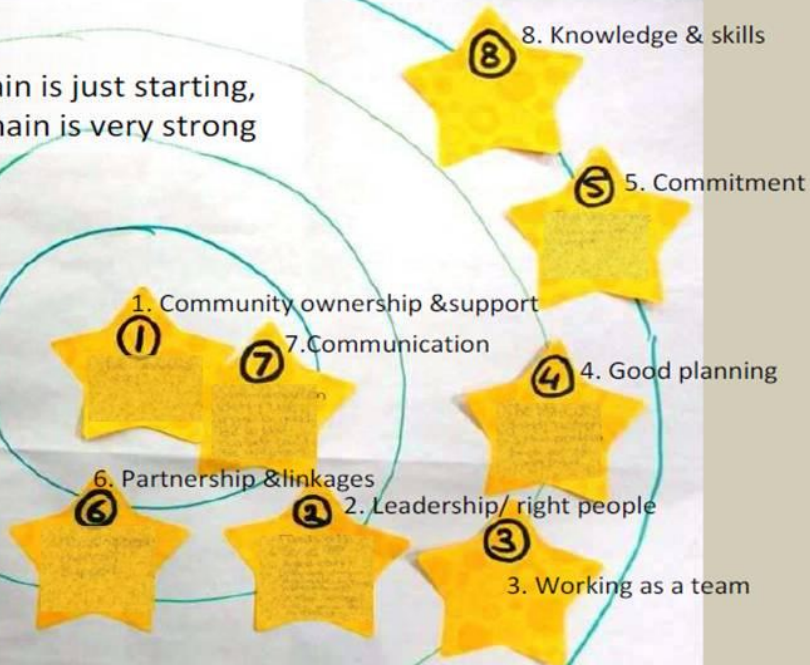

Supplement: MOESM3 [file 9499694]
